# Supplementary material for: Entorhinal transformations in abstract frames of reference
Source: PLOS journal article supplement (doi:10.1371/journal.pbio.3000230), 2019-05-02

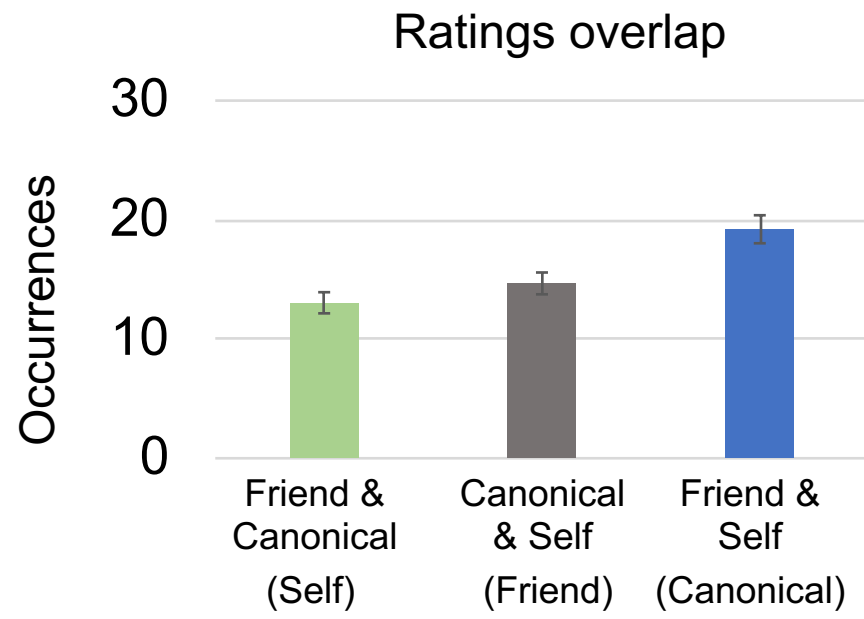

Supplement: S1 (10.1371/journal.pbio.3000230.s001) [file journal.pbio.3000230.s001]
