# Supplementary material for: Entorhinal transformations in abstract frames of reference
Source: PLoS Biol. 2019 May 2;17(5):e3000230. doi: 10.1371/journal.pbio.3000230 (PMC6497227; doi:10.1371/journal.pbio.3000230)
Supplement: S1 Data — (XLSX) [file pbio.3000230.s007.xlsx]

## Sheet: Fig_2A
Canonical										Self										Friend
Rating	One	Two	Three	Four	Five	Six	Seven	Eight	Nine		One	Two	Three	Four	Five	Six	Seven	Eight	Nine		One	Two	Three	Four	Five	Six	Seven	Eight	Nine
Subj1	1	2	0	5	9	24	31	19	9	Subj1	29	6	4	4	4	5	13	15	20	Subj1	6	4	10	5	9	6	5	12	43
Subj2	1	4	21	12	21	16	20	5	0	Subj2	7	16	10	9	10	13	16	10	9	Subj2	7	13	7	7	16	14	10	19	7
Subj3	0	2	5	11	19	34	26	3	0	Subj3	3	4	12	11	27	17	16	10	0	Subj3	7	19	15	22	10	15	8	4	0
Subj4	0	1	2	7	60	24	4	2	0	Subj4	5	27	11	8	17	7	19	1	5	Subj4	3	12	8	10	19	22	14	11	1
Subj5	3	1	6	14	28	15	15	5	13	Subj5	16	6	3	4	7	10	17	12	25	Subj5	23	4	6	6	9	10	9	5	28
Subj6	0	2	6	8	32	25	17	6	4	Subj6	16	14	10	6	11	13	8	11	11	Subj6	14	12	11	12	9	9	16	12	5
Subj7	4	5	7	15	11	27	21	9	1	Subj7	34	12	2	11	4	7	8	6	16	Subj7	13	12	12	8	6	21	10	9	9
Subj8	1	2	6	9	29	10	33	10	0	Subj8	6	18	5	6	18	6	13	17	11	Subj8	17	22	11	3	13	1	13	6	14
Subj9	0	0	2	4	45	27	20	0	2	Subj9	17	29	0	0	13	3	13	2	23	Subj9	8	9	1	9	18	2	21	9	23
Subj10	0	1	2	9	53	14	16	3	2	Subj10	6	10	11	9	20	10	20	2	12	Subj10	4	9	4	10	34	9	22	4	4
Subj11	0	6	10	25	19	16	13	10	1	Subj11	16	17	8	5	6	5	10	14	19	Subj11	15	16	10	6	7	7	10	10	19
Subj12	2	6	4	14	15	10	18	23	8	Subj12	8	12	3	12	8	10	14	17	16	Subj12	34	15	5	7	7	5	10	9	8
Subj13	0	10	28	14	19	12	10	7	0	Subj13	4	13	9	6	13	16	20	10	9	Subj13	2	7	12	11	14	15	21	11	7
Subj14	0	2	5	15	28	22	14	13	1	Subj14	9	14	11	10	9	12	11	18	6	Subj14	16	9	11	12	6	7	14	18	7
Subj15	1	0	1	6	27	11	28	13	13	Subj15	21	18	4	5	21	2	9	6	14	Subj15	5	15	9	7	26	3	12	9	14
Subj16	3	7	3	3	32	4	11	20	17	Subj16	27	12	1	5	18	1	5	8	23	Subj16	12	8	3	5	28	4	7	13	20
Subj17	0	1	3	12	50	25	6	3	0	Subj17	24	7	11	4	3	6	12	8	25	Subj17	22	16	9	9	2	3	17	13	9
Subj18	0	1	2	8	20	34	25	10	0	Subj18	6	9	8	8	15	8	13	19	14	Subj18	16	20	17	11	10	7	8	6	5
Subj19	0	0	3	8	20	38	21	9	1	Subj19	10	5	1	5	13	14	20	23	9	Subj19	41	10	6	11	8	7	9	1	7
Subj20	0	0	0	1	21	9	26	31	12	Subj20	27	5	8	0	14	7	22	7	10	Subj20	14	14	16	12	23	6	3	5	7
Subj21	2	1	11	11	36	13	18	5	3	Subj21	32	6	8	2	8	6	11	3	24	Subj21	24	7	15	8	14	7	10	4	11
Subj22	0	0	9	8	23	27	25	7	1	Subj22	13	6	7	3	1	7	14	17	32	Subj22	7	22	17	11	4	7	14	7	11
Subj23	0	2	2	6	9	19	38	18	6	Subj23	3	12	7	6	7	7	13	26	19	Subj23	21	9	9	8	4	11	3	20	15
Subj24	2	6	16	19	23	12	13	6	3	Subj24	27	13	10	14	5	13	8	2	8	Subj24	25	24	9	17	7	3	8	3	4

## Sheet: Fig_2B
Rating Consistency	Zero	One	Two	>=Three
Subj1	26	30	20.5	23.5
Subj2	41	41.5	15	2.5
Subj3	43.5	44.5	11.5	0.5
Subj4	50	36.5	9.5	4
Subj5	31.5	31.5	22.5	14.5
Subj6	42	43	12.5	2.5
Subj7	24.5	39.5	20.5	15.5
Subj8	43.5	31.5	18	7
Subj9	48.5	38	10.5	3
Subj10	53.5	34.5	11	1
Subj11	32.5	51	13	3.5
Subj12	29.5	44.5	15	11
Subj13	37.5	39	17.5	6
Subj14	33	41	16	10
Subj15	30	28.5	24	17.5
Subj16	31.5	34.5	18	16
Subj17	36.5	38	12.5	13
Subj18	36	42	16	6
Subj19	33.5	39.5	21	6
Subj20	29	35.5	20	15.5
Subj21	49.5	32.5	13	5
Subj22	34.5	43.5	15	7
Subj23	29.5	42.5	17.5	10.5
Subj24	17	40.5	18	24.5

## Sheet: Fig_2C
MeanAbsoluteDistance	Self	Friend	Canonical
Subj1	1.89674	2.69072	2.88587
Subj2	1.85119	1.93038	2.03425
Subj3	2.14045	1.42763	1.86047
Subj4	1.56548	2.01124	2.14706
Subj5	2.04861	1.99333	1.9322
Subj6	2.07059	2.13529	2.18182
Subj7	2.375	2.53933	2.59459
Subj8	2.81053	2.36145	3.11333
Subj9	2.10366	2.37791	2.83333
Subj10	1.72727	1.85417	2.25
Subj11	2.16146	2.32184	2.39855
Subj12	3.13043	1.85714	3.26111
Subj13	2.26744	2.55747	2.20732
Subj14	2.55	2.4	2.41429
Subj15	2.54321	2.94512	2.50649
Subj16	1.97101	2.64179	2.49074
Subj17	2.41753	2.64516	3.4382
Subj18	2.47222	1.89506	2.6506
Subj19	2.98925	1.86301	2.98864
Subj20	2.86458	2.56566	2.96875
Subj21	2.56522	2.57738	3.06849
Subj22	2.30556	2.52128	3.48404
Subj23	2.94444	2.18987	2.87079
Subj24	2.2766	1.84211	2.17059

## Sheet: Fig_2D
	Self	Friend	Canonical
Subj1	3517.13	3673.42	3621.73
Subj2	4295.92	3756.23	4201.87
Subj3	4568.67	4295.52	4651.8
Subj4	2839.38	2849.16	2793.67
Subj5	4904.51	4466.08	4764.48
Subj6	3424.37	3446.09	4132.17
Subj7	4449.77	4285.77	4683.02
Subj8	4558.7	4541.99	3869.59
Subj9	3230.57	2875.72	3012
Subj10	4158.41	3991.34	3938.38
Subj11	4610.33	4356.04	4869.87
Subj12	5172.86	4774.55	4558.95
Subj13	5002.64	4810.05	5223.85
Subj14	3181.76	3304.87	4080.64
Subj15	2873.2	3040.9	2978.7
Subj16	4708	4209.5	4667.4
Subj17	4566.4	3996.1	3818.8
Subj18	3585.9	3564.4	3775.6
Subj19	3531	3994.8	3660.8
Subj20	3044.2	3015.7	2817.2
Subj21	3803.9	3799.3	4132.6
Subj22	4551.8	3985.5	3804.6
Subj23	6399.6	6500.2	6630.2
Subj24	4158.9	4023.9	4013.1

## Sheet: Fig_2E
Accuracy	One	Two	Three	Four	Five	Six	Seven	Eight
Subj1	0.53125	0.666667	0.695652	0.740741	0.944444	0.833333	1	1
Subj2	0.744898	0.846154	0.945946	1	0.75	1	NaN	NaN
Subj3	0.614035	0.692308	0.853659	0.692308	1	1	NaN	NaN
Subj4	0.657895	0.888889	1	0.941176	1	1	NaN	NaN
Subj5	0.472973	0.61039	0.83871	0.823529	0.5	0.666667	NaN	NaN
Subj6	0.769231	0.810811	0.916667	0.913043	1	1	1	1
Subj7	0.5625	0.5	0.5	0.666667	0.8	0.888889	NaN	0.75
Subj8	0.677966	0.645161	0.851852	0.829268	0.857143	1	1	1
Subj9	0.732143	0.876543	0.87037	0.964286	0.916667	1	1	NaN
Subj10	0.761905	0.802817	0.904762	0.952381	1	1	0.5	NaN
Subj11	0.711111	0.764706	0.780488	0.9	0.941176	1	1	NaN
Subj12	0.434783	0.759259	0.777778	0.695652	0.807692	0.909091	1	1
Subj13	0.649351	0.768293	0.837209	0.896552	0.875	1	1	NaN
Subj14	0.62069	0.597403	0.481481	0.666667	0.833333	0.888889	0.5	NaN
Subj15	0.471698	0.552239	0.689655	0.727273	0.733333	1	1	1
Subj16	0.647887	0.72973	0.853659	0.827586	1	1	1	1
Subj17	0.588235	0.623188	0.622642	0.85	0.818182	0.8	1	1
Subj18	0.736842	0.753623	0.842857	0.95	0.666667	1	1	1
Subj19	0.595506	0.52381	0.825	0.833333	1	0.875	1	1
Subj20	0.535714	0.593407	0.74	0.765957	0.869565	0.923077	0.9	1
Subj21	0.557692	0.57971	0.711538	0.866667	0.727273	0.882353	0.666667	NaN
Subj22	0.777778	0.823529	0.903226	0.878788	0.913043	1	1	1
Subj23	0.511364	0.727273	0.536585	0.733333	0.75	0.789474	0.5	1
Subj24	0.642105	0.533333	0.719298	0.736842	0.818182	1	NaN	NaN

## Sheet: Fig_2F
Choice Entropy	Self	Friend	Canonical
Subj1	0.210713	0.133771	0.12096
Subj2	0.284769	0.240224	0.225672
Subj3	0.256447	0.224448	0.205348
Subj4	0.360749	0.208496	0.2298
Subj5	0.188434	0.15357	0.210253
Subj6	0.380671	0.20905	0.181798
Subj7	0.148997	0.124852	0.130331
Subj8	0.168124	0.154419	0.129064
Subj9	0.178089	0.183836	0.0959841
Subj10	0.381258	0.230693	0.158778
Subj11	0.293887	0.211061	0.172475
Subj12	0.164176	0.153131	0.120434
Subj13	0.227808	0.164951	0.172531
Subj14	0.106128	0.127627	0.110562
Subj15	0.162035	0.0757793	0.129809
Subj16	0.256217	0.136131	0.183194
Subj17	0.158057	0.090682	0.0865233
Subj18	0.189166	0.228462	0.127287
Subj19	0.208349	0.19048	0.162149
Subj20	0.129594	0.130192	0.110892
Subj21	0.182106	0.149208	0.0902956
Subj22	0.103015	0.0808339	0.0419925
Subj23	0.167964	0.163453	0.115754
Subj24	0.215646	0.198127	0.156951
